# Supplementary material
Source: publisher figshare collection journal article supplement (https://sage.figshare.com/ndownloader/files/28237976)
Supplement: Supplementary file 1 [file 28237976]

## Sheet: counts
Appendix 1. Pollen, spores and non-pollen palynomorphs dataset for the Lake Bayan Nuur sediment core
Taxa/Depth, cm	0	1	2	4	5	6	7	8	10	11	12	13	14	16	17	18	19	20	22	23	24	25	26	28	29	30	31	32	34	35	36	37	38	40	41	42	43	44	46	47	48	49	50	52	53	54	55	56	58
Abies					1					1		2	1				1					1						1	5		1				2			2	1			2			1	1
Larix				1				2	1	1			1		2		1				1			1		1			1							1
Picea	1	6		1			3	10	10	7	2	1	8	3	6	5	7	2	5		5		5	3	3	3	2	2		4	2	4	6	2	6	6	1	5		2		1	2	1	4	4	1	1	3
Pinaceae	5	3	2			3	3	3	2	3	1	1	1	1	5	1	2	2		2	1	2		1			1			2	2		1			4	5		2			3					2		1
Pinus	2					2	2	2	1		1	5		2				3			2		4			6	1	1	2		1				2		1	2	1		1			2
Pinus sibirica	17	27	7	24	3	6	9	30	20	45	30	22	36	34	27	22	27	34	21	16	22	17	16	27	29	36	33	19	18	11	22	15	30	19	23	19	21	11	26	13	21	15	12	25	23	37	14	19	24
Pinus sylvestris	29	19	29	16	20	18	34	21	21	15	34	13	20	26	32	39	23	24	17	23	25	14	9	22	22	28	15	27	16	23	15	14	13	23	56	16	25	10	11	9	10	24	11	20	12	8	13	15	12
Alnus		1									1																		1						1
Alnus subg. Alnobetula			1	1			2			3				1						1	1	1	1					2	1										1	1				1	1			1
Betula	26	28	23	28	22	24	21	26	24	29	23	36	22	13	24	25	20	27	20	20	12	10	12	20	9	9	8	9		8	9	11	15	12	11	19	8	9	10	14	11	10	5	12	14	16	13	20	2
Ephedra	10	18	8	7	7	6	8	8	5	8	10	9	14	13	8	14	12	15	14	5	8	8	6	13	14	10	13	8	12	20	8	8	9	9	14	9	5	8	11	6	8	4	7	5	4	9	6	11	8
Ericales																																											1
Hippophaë																	1											3							1
Juglans			1												2						1	1
Juniperus
Lonicera
Nitraria sibirica	1													1
Ribes																																													1
Salix		1		3	2	4				3	1	3		1		2		2	1	2	2	2	2				3	1	1	2		3	1	1	3		2	4		8	3	2		2	1	1	2	1	3
Tsuga cf							2																						1
Ulmus																																					1
Allium				1										1																																		1
Amaranthaceae	113	121	72	91	88	73	113	97	110	85	100	94	89	113	110	94	115	108	119	129	124	131	130	119	115	138	102	113	128	171	168	107	162	123	191	103	109	121	91	92	92	126	121	73	94	110	102	74	103
Apiaceae																																1										1						1
Artemisia	97	104	118	156	147	151	77	70	71	91	120	96	83	81	68	86	135	98	104	123	106	103	102	104	139	101	81	123	56	101	112	140	95	124	185	121	115	122	147	161	152	101	161	180	151	133	150	140	155
Asteraceae subf. Asteroideae					3		1	2	1			1					1	1	1	1	1	1	1			1			3						2	2	2	2	1	1			3		2	1		1
Asteraceae subf. Cichorioideae		1		1		1				1				1						1	3			1	1										1						1	1
Brassicaceae	1	4	1				3	2	4	1	1	4	1	1			2	2	1				1	2	3		1	1	2		1	1	1	3		6	1			6	1		2			4	2
Caryophyllaceae					2			2				1	1						1				4		1								1	1	2	2	1	1	1		1					1
Cerealia cf				1
Cyperaceae	20	25	12	12	18	10	19	13	17	27	21	12	21	10	12	19	10	20	9	17	14	24	18	16	5	16	20	5	15	13	15	11	12	10	25	17	14	19	16	17	6	7	5	6	12	4	5	10	7
Fabaceae						3						2								1
Geraniaceae																						1
Lamiaceae									2						1				1	1		1				3	2					1					1	1		1			1	1		1		2
Liliaceae															1
Other herbs	6	7	6	3	2	4	13	17	24	11	9	7	8	8	1	6	3	7	15	10	9	6	13	19	2	19	14	1	7	11	3	5	8	2	10	16	12	8	7	9	9	11	6	7	2	8	1	9	1
Plantago					2										2					2	1									1		1	1		1									1			1
Poaceae	4	12	30	15	18	18	5	3	9	7	9	9	2	5	9	5	7		11	9	2		3	1	2	5	6	1	4	2	4	10	6	11	6	12	6	6	9	4	6	7	2	7	5	11	3	13	6
Polemonium							1
Polygonum																															1
Ranunculaceae		1		1	1				1					2				1						1	1		2				2	1			1					1							1		1
Rosaceae	1	3	2	1					1	1	1		2	2	1	1	1	1	1			1		1				1			1	1			2	1	1						3	1	1		2	1
Rumex																																	1
Sanguisorba																																																1
Saxifraga				1											1		1																	3
Sparganium				1	2							1													1						2	1		1			1								1
Thalictrum										1					1		1												2				1					1				2	2		2		3
Typha	1
Urtica					1
Valerinaceae																																	1
Lycopodium							1	1				3										1			1			1			1		1					2
Polypodiophyta				1	1				3		3	1	1	1	1		2			3			2			1		2	1					1					1			1						1	1
Selaginella rupestris							1										1	1									1		1		1		2	1	1							1							1
Sphagnum		1											1							1														1
Amoebae	2				1
Arcella arenaria		10	1			1										1			1						3		1		2							1					1
Botryococcus	6	11	3	6	6	8	8	5	6	15	6	7	4	6	5	3		8	1	9	3	3	5	1	8	13	3	3	7	3	4	5	9	6	6	1	2			1	3	1	1		3	3	1	2	1
cf Debarya	2	1	2	1	2	1	5	2	3		1		2					1	1
Coprophilous fungi	90	59	115	148	84	50	51	102	144	133	93	36	131	80	147	45	98	110	162	94	44	36	44	56	26	70	116	56	109	86	30	25	10	5	7	17	14	20	11	12	8	7	2	24	74	76	64	35	39
Cosmarium	1						2																1							1		1				2
Eucoleus hepatica																																																1
Glomus	3	5	3	3	3	1	5	4	2		5	3		2	3	1	5	3	1	4	2	2	1	1	3	2	3	4	2	11	3	8	3	4	6	5	2	6		3	2	2	1	3	8	1	3	2	1
Macrobiotus hufelandii																																				1
Pediastrum					4			1																			1
Sordaria
Tardigrada																																1					1
[truncated: 45 more columns]
